# Supplementary material
Source: Springer Nature journal article supplement (https://www.springermedizin.de/resource/supplementary/40164_2013_59_MOESM1_ESM.pdf/9687104)

**H/E**

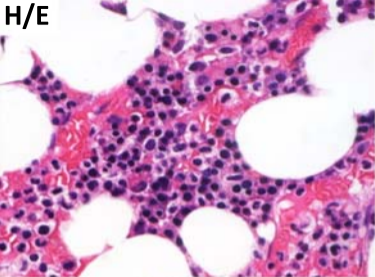

**CD20**

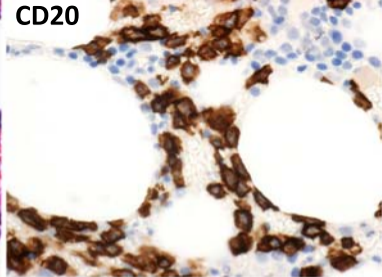

**DBA44**

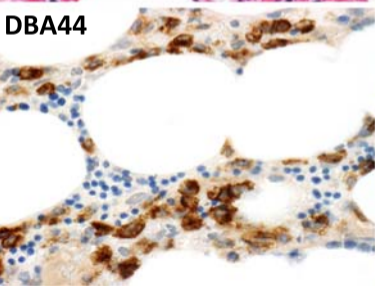

**V600E BRAF**

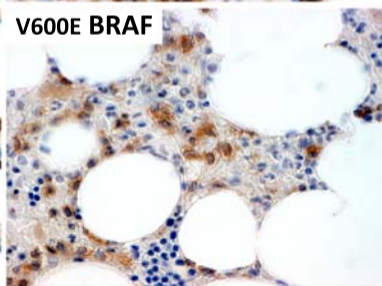

Supplement: MOESM1 [file 9687104]
